# Supplementary material for: Worldwide epidemiology of Crimean-Congo Hemorrhagic Fever Virus in humans, ticks and other animal species, a systematic review and meta-analysis
Source: PLOS journal article supplement (doi:10.1371/journal.pntd.0009299), 2021-04-22

S5 Fig. Funnel plot for publication of global Crimean-congo hemorrhagic fever virus case fatality rate in humans with ongoing infections

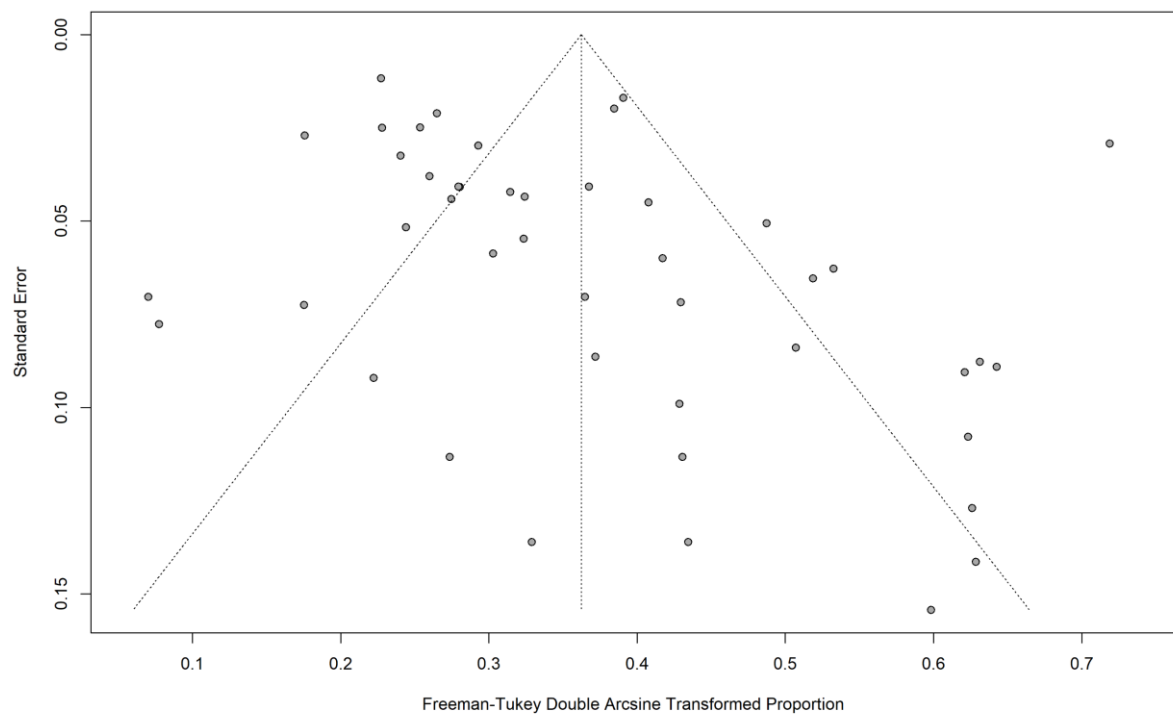

Supplement: S18 (10.1371/journal.pntd.0009299.s018) [file journal.pntd.0009299.s018]
